# Supplementary material
Source: Springer Nature journal article supplement (https://www.springermedizin.de/resource/supplementary/12931_2013_1432_MOESM2_ESM.pdf/9425990)

# Explanatory value for PAL ( $r^2$ )

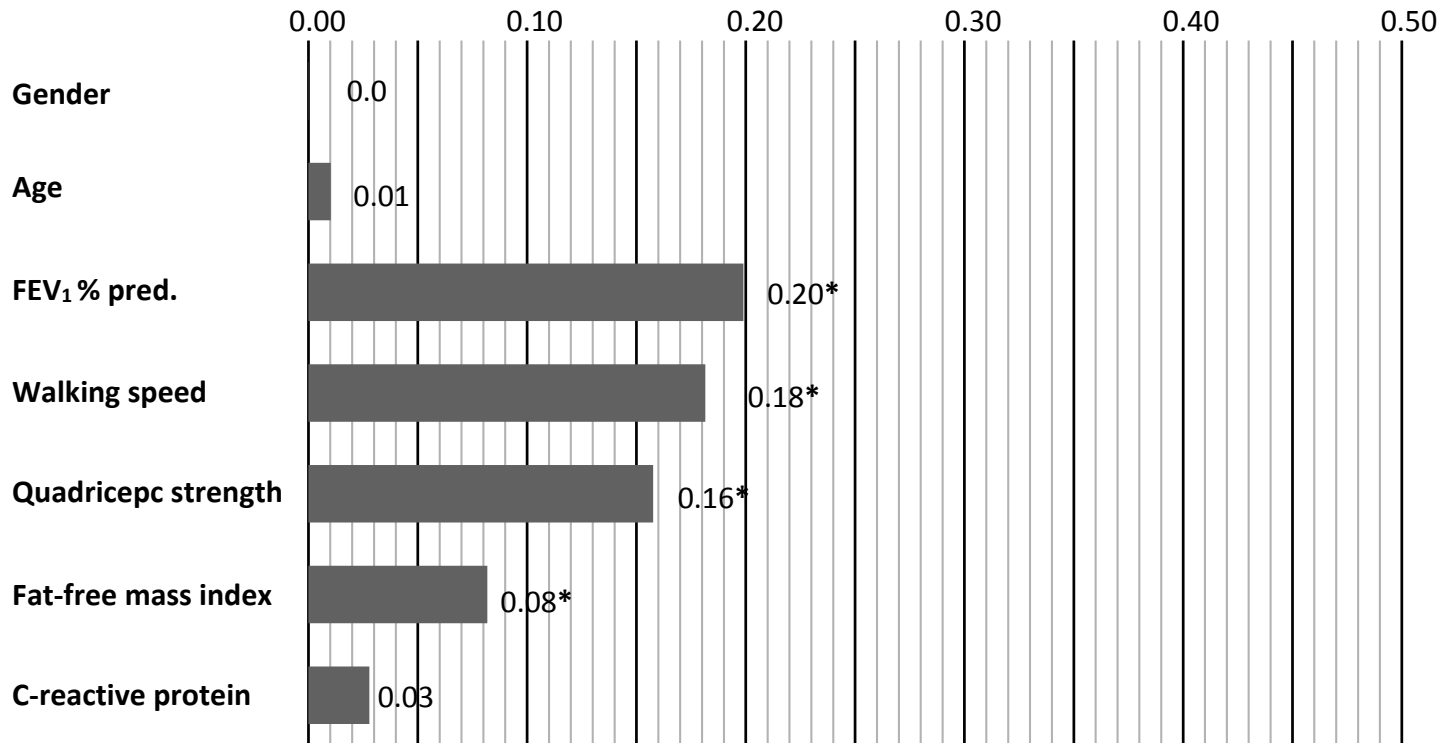

Supplement: MOESM2 [file 9425990]
